# Supplementary material
Source: MDPI journal article supplement (https://www.mdpi.com/2079-6412/13/2/383)
Supplement: s1 [file s1 › coatings-2172699 supporting infromation.pdf]

# Electrochemical Deposition of Conductive Polymers on Fabrics

Jose F. Serrano-Claumarchirant <sup>1,2</sup>, Rafael Muñoz-Espí <sup>1</sup>, Andrés Cantarero <sup>3</sup>, Mario Culebras <sup>1</sup>,  
and Clara M. Gómez <sup>1,\*</sup>

<sup>1</sup> Institute of Material Science, University of Valencia, 46980 Paterna, Spain

<sup>2</sup> School of Engineering and Materials Science, Queen Mary University of London, Mile End Road, London E1 4NS, UK

<sup>3</sup> Institute of Molecular Science, University of Valencia, 46980 Paterna, Spain

\* Correspondence: clara.gomez@uv.es

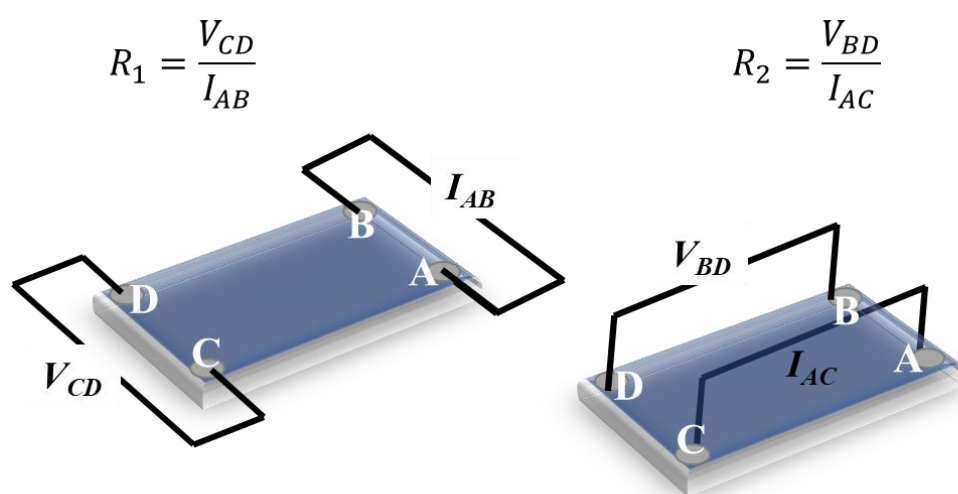

**Figure S1.** Contacts configurations to measure electrical resistance  $R_1$  and  $R_2$ .

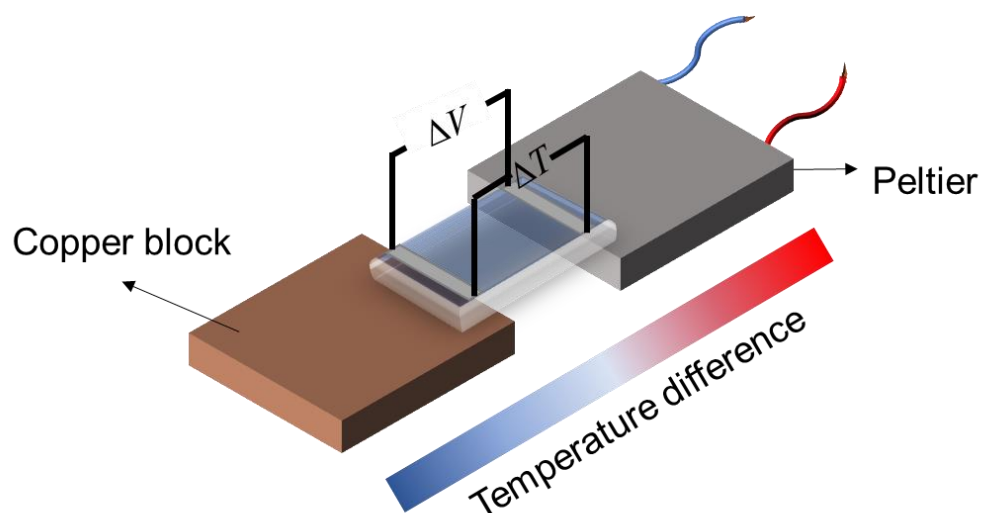

**Figure S2.** Scheme of the homemade setup to measure Seebeck coefficient.
